# Supplementary material
Source: PubMed Central journal article supplement (PMC9020885)
Supplement: NIHMS1795884-supplement-1.pdf [file NIHMS1795884-supplement-1.pdf]

Supplemental table 1: Presence of chronic complex condition by race/ethnicity n=9,816 (excluding any patients missing information on race/ethnicity, insurance status or transferred out)

|                                      |     | White |      | Black |      | Hispanic |      | Other |      | Total |      | P value |
|--------------------------------------|-----|-------|------|-------|------|----------|------|-------|------|-------|------|---------|
|                                      |     | N.    | %    | N.    | %    | N.       | %    | N.    | %    | N.    | %    |         |
| Neuromuscular CCC                    | No  | 3,803 | 81.5 | 1,344 | 81.1 | 2,032    | 81.2 | 820   | 83.2 | 7,999 | 81.5 | 0.53    |
|                                      | Yes | 865   | 18.5 | 314   | 18.9 | 472      | 18.9 | 166   | 16.8 | 1,817 | 18.5 |         |
| Cardiovascular CCC                   | No  | 3,865 | 82.8 | 1,315 | 79.3 | 2,044    | 81.6 | 801   | 81.2 | 8,025 | 81.8 | 0.017   |
|                                      | Yes | 803   | 17.2 | 343   | 20.7 | 460      | 18.4 | 185   | 18.8 | 1,791 | 18.3 |         |
| Respiratory CCC                      | No  | 4,228 | 90.6 | 1,489 | 89.8 | 2,273    | 90.8 | 893   | 90.6 | 8,883 | 90.5 | 0.76    |
|                                      | Yes | 440   | 9.4  | 169   | 10.2 | 231      | 9.2  | 93    | 9.4  | 933   | 9.5  |         |
| Renal CCC                            | No  | 4,142 | 88.7 | 1,454 | 87.7 | 2,205    | 88.1 | 897   | 91.0 | 8,698 | 88.6 | 0.054   |
|                                      | Yes | 526   | 11.3 | 204   | 12.3 | 299      | 11.9 | 89    | 9.0  | 1,118 | 11.4 |         |
| Gastrointestinal CCC                 | No  | 3,553 | 76.1 | 1,240 | 74.8 | 1,847    | 73.8 | 755   | 76.6 | 7,395 | 75.3 | 0.12    |
|                                      | Yes | 1,115 | 23.9 | 418   | 25.2 | 657      | 26.2 | 231   | 23.4 | 2,421 | 24.7 |         |
| Heme/immuno CCC                      | No  | 4,043 | 86.6 | 1,300 | 78.4 | 2,026    | 80.9 | 814   | 82.6 | 8,183 | 83.4 | <0.001  |
|                                      | Yes | 625   | 13.4 | 358   | 21.6 | 478      | 19.1 | 172   | 17.4 | 1,633 | 16.6 |         |
| Metabolic CCC                        | No  | 3,537 | 75.8 | 1,221 | 73.6 | 1,853    | 74.0 | 738   | 74.9 | 7,349 | 74.9 | 0.23    |
|                                      | Yes | 1,131 | 24.2 | 437   | 26.4 | 651      | 26.0 | 248   | 25.2 | 2,467 | 25.1 |         |
| Congenital genetic CCC               | No  | 4,218 | 90.4 | 1,519 | 91.6 | 2,273    | 90.8 | 905   | 91.8 | 8,915 | 90.8 | 0.31    |
|                                      | Yes | 450   | 9.6  | 139   | 8.4  | 231      | 9.2  | 81    | 8.2  | 901   | 9.2  |         |
| Malignancy CCC                       | No  | 4,031 | 86.4 | 1,492 | 90.0 | 1,994    | 79.6 | 834   | 84.6 | 8,351 | 85.1 | <0.001  |
|                                      | Yes | 637   | 13.7 | 166   | 10.0 | 510      | 20.4 | 152   | 15.4 | 1,465 | 14.9 |         |
| Neonatal CCC                         | No  | 4,304 | 92.2 | 1,431 | 86.3 | 2,327    | 92.9 | 883   | 89.6 | 8,945 | 91.1 | <0.001  |
|                                      | Yes | 364   | 7.8  | 227   | 13.7 | 177      | 7.1  | 103   | 10.5 | 871   | 8.9  |         |
| Technology dependent CCC             | No  | 3,333 | 71.4 | 1,132 | 68.3 | 1,744    | 69.7 | 723   | 73.3 | 6,932 | 70.6 | 0.016   |
|                                      | Yes | 1,335 | 28.6 | 526   | 31.7 | 760      | 30.4 | 263   | 26.7 | 2,884 | 29.4 |         |
| Transplant CCC                       | No  | 4,562 | 97.7 | 1,620 | 97.7 | 2,428    | 97.0 | 957   | 97.1 | 9,567 | 97.5 | 0.18    |
|                                      | Yes | 106   | 2.3  | 38    | 2.3  | 76       | 3.0  | 29    | 2.9  | 249   | 2.5  |         |
| Number of complex chronic conditions | 1   | 1,351 | 28.9 | 366   | 22.1 | 631      | 25.2 | 261   | 26.5 | 2,609 | 26.6 | <0.001  |
|                                      | 2   | 1,301 | 27.9 | 490   | 29.6 | 643      | 25.7 | 272   | 27.6 | 2,706 | 27.6 |         |
|                                      | 3   | 975   | 20.9 | 371   | 22.4 | 544      | 21.7 | 234   | 23.7 | 2,124 | 21.6 |         |
|                                      | 4   | 628   | 13.5 | 255   | 15.4 | 406      | 16.2 | 130   | 13.2 | 1,419 | 14.5 |         |
|                                      | 5   | 272   | 5.8  | 119   | 7.2  | 198      | 7.9  | 61    | 6.2  | 650   | 6.6  |         |
|                                      | 6   | 116   | 2.5  | 44    | 2.7  | 70       | 2.8  | 24    | 2.4  | 254   | 2.6  |         |
|                                      | 7   | 22    | 0.5  | 10    | 0.6  | 9        | 0.4  | 3     | 0.3  | 44    | 0.5  |         |
|                                      | 8   | 3     | 0.1  | 2     | 0.1  | 3        | 0.1  | 0     | 0.0  | 8     | 0.1  |         |
|                                      | 9   | 0     | 0.0  | 1     | 0.1  | 0        | 0.0  | 1     | 0.1  | 2     | 0.0  |         |

Supplemental table 2: Univariable (crude) odds ratios of death in children (aged 0-20) from severe sepsis in 2016 (n=9,816)

|                                      |                        | OR   | 95% CI           | P value <sup>a</sup> |
|--------------------------------------|------------------------|------|------------------|----------------------|
| Age                                  | 0                      | 5.20 | (4.45-6.06)      |                      |
|                                      | 1-5                    | 1.77 | (1.47-2.13)      |                      |
|                                      | 6-12                   | 1.46 | (1.22-1.76)      |                      |
|                                      | 13-17                  | 1.14 | (0.95-1.38)      |                      |
|                                      | 18-20                  | 1    | ref <sup>b</sup> | <0.0001              |
| Sex                                  | Male                   | 1.28 | (1.16-1.42)      |                      |
|                                      | Female                 | 1    | ref              | <0.0001              |
| Race                                 | White                  | 1    | ref              |                      |
|                                      | Black                  | 1.37 | (1.19-1.58)      |                      |
|                                      | Hispanic               | 0.97 | (0.85-1.12)      |                      |
|                                      | Other                  | 1.17 | (0.98-1.40)      | <0.0001              |
| Payer                                | Public insurance       | 1    | ref              |                      |
|                                      | Private insurance      | 0.94 | (0.84-1.05)      |                      |
|                                      | Other                  | 1.1  | (0.90-1.34)      | 0.26                 |
| Median Household Income for zip code | \$0 - \$42,999         | 1    | ref              |                      |
|                                      | \$43,000 - \$53,999    | 1.09 | (0.95-1.24)      |                      |
|                                      | \$54,000 - \$70,999    | 0.95 | (0.83-1.10)      |                      |
|                                      | \$71,000+              | 0.90 | (0.77-1.05)      | 0.11                 |
| Hospital region                      | Northeast              | 0.84 | (0.66-1.08)      |                      |
|                                      | Midwest                | 0.68 | (0.54-0.86)      |                      |
|                                      | South                  | 1    | Ref              |                      |
|                                      | West                   | 0.71 | (0.57-0.87)      | 0.0013               |
| Bed size                             | Small                  | 0.57 | (0.43-0.75)      |                      |
|                                      | Medium                 | 0.74 | (0.60-0.92)      |                      |
|                                      | Large                  | 1    | ref              | 0.0001               |
| Hospital location                    | Rural                  | 0.51 | (0.29-0.89)      |                      |
|                                      | Urban nonteaching      | 0.47 | (0.36-0.61)      |                      |
|                                      | Urban teaching         | 1    | ref              | <0.0001              |
| Hospital control                     | Government, nonfederal | 1.29 | (1.01-1.64)      |                      |
|                                      | Private, not-profit    | 1    | ref              |                      |
|                                      | Private, invest-own    | 0.97 | (0.75-1.26)      | 0.10                 |
| Complex chronic condition            | No                     | 1    | ref              |                      |
|                                      | Yes                    | 7.21 | (5.92-8.80)      | <0.0001              |

<sup>a</sup> LR test p-value

<sup>b</sup> Largest group chosen for reference

Supplemental table 3: Mortality. Median length of stay, crude and adjusted odds ratios of mortality for cohort n=9,816 (excluding any patients missing information on race/ethnicity, insurance status, or transferred out)

|                   | n     | %    | mortality % | LOS (IQR) | OR   | 95% CI      | P value <sup>a</sup> | aOR <sup>b</sup> | 95% CI      | P value <sup>c</sup> |
|-------------------|-------|------|-------------|-----------|------|-------------|----------------------|------------------|-------------|----------------------|
| Public            | 5,385 | 54.7 | 15.0        | 10 (5-22) | 1    |             |                      | 1                |             |                      |
| Payer             |       |      |             |           |      |             |                      |                  |             |                      |
| Private insurance | 3,670 | 37.4 | 13.8        | 8 (4-18)  | 0.93 | (0.82-1.05) |                      | 1.09             | (0.96-1.23) | 0.19                 |
| Self-Pay          | 339   | 3.0  | 14.4        | 5 (3-13)  | 0.98 | (0.70-1.38) |                      | 1.37             | (0.97-1.94) | 0.076                |
| No Charge         | 21    | 0.2  | 9.5         | 3 (2-7)   | 0.59 | (0.13-2.61) |                      | 1.43             | (0.36-5.72) | 0.61                 |
| Other             | 442   | 4.5  | 17          | 12 (5-24) | 1.16 | (0.87-1.55) | 0.49                 | 1.24             | (0.95-1.64) | 0.11                 |

<sup>a</sup> LR test p-value

<sup>b</sup> Adjusted for other variables in the table and sex, age, median household income for patient's zip code, elective admission, admitted from emergency department, transferred in, admitted at weekend, admission quarter, hospital bed size, hospital region, hospital control, hospital teaching status, presence of complex chronic condition

<sup>c</sup> Wald test-p-value

Supplemental table 4: Crude and adjusted odds ratios of death and length of stay (hazard ratios for discharge alive by 30 days)<sup>a</sup> in children with severe sepsis in 2016 by race/ethnicity and insurance status, clustered by hospital stratified by neonatal vs non neonate

|                                            |       | Unadjusted odds of death |        |                      | Adjusted <sup>b</sup> odds of death |        |                      | Adjusted <sup>b</sup> hazard for discharge alive by 30 days |        |                      |       |
|--------------------------------------------|-------|--------------------------|--------|----------------------|-------------------------------------|--------|----------------------|-------------------------------------------------------------|--------|----------------------|-------|
|                                            |       | OR                       | 95% CI | P value <sup>c</sup> | aOR                                 | 95% CI | P value <sup>d</sup> | aHR                                                         | 95% CI | P value <sup>d</sup> |       |
| Neonates<br>(n=1,031)                      | Race  | White                    | 1      | Ref                  |                                     | 1      |                      | 1                                                           |        |                      |       |
|                                            |       | Black                    | 1.52   | (1.09-2.11)          |                                     | 1.21   | (0.85-1.74)          | 0.29                                                        | 0.53   | (0.36-0.77)          | 0.001 |
|                                            |       | Hispanic                 | 0.97   | (0.68-1.38)          |                                     | 0.87   | (0.60-1.27)          | 0.48                                                        | 0.74   | (0.51-1.06)          | 0.10  |
|                                            |       | Other                    | 1.29   | (0.85-1.95)          | 0.054                               | 1.22   | (0.79-1.89)          | 0.36                                                        | 0.88   | (0.60-1.29)          | 0.52  |
|                                            | Payer | Public insurance         | 1      | Ref                  |                                     | 1      |                      |                                                             | 1      |                      |       |
|                                            |       | Private insurance        | 0.99   | (0.76-1.31)          |                                     | 1.12   | (0.82-1.53)          | 0.47                                                        | 1.01   | (0.76-1.35)          | 0.94  |
|                                            |       | Other                    | 0.72   | (0.41-1.28)          | 0.53                                | 0.83   | (0.46-1.51)          | 0.54                                                        | 1.10   | (0.63-1.90)          | 0.74  |
| 0-20<br>excluding<br>neonates<br>(n=8,785) | Race  | White                    | 1      |                      |                                     | 1      |                      | 1                                                           |        |                      |       |
|                                            |       | Black                    | 1.21   | (1.03-1.43)          |                                     | 1.15   | (0.96-1.38)          | 0.12                                                        | 0.90   | (0.84-0.96)          | 0.003 |
|                                            |       | Hispanic                 | 1.02   | (0.87-1.19)          |                                     | 1.01   | (0.86-1.20)          | 0.87                                                        | 0.94   | (0.88-1.00)          | 0.039 |
|                                            |       | Other                    | 1.04   | (0.85-1.29)          | 0.14                                | 1.00   | (0.80-1.25)          | 0.98                                                        | 0.96   | (0.89-1.05)          | 0.37  |
|                                            | Payer | Public insurance         | 1      |                      |                                     | 1      |                      |                                                             | 1      |                      |       |
|                                            |       | Private insurance        | 0.93   | (0.82-1.06)          |                                     | 1.03   | (0.89-1.19)          | 0.68                                                        | 1.06   | (1.01-1.12)          | 0.017 |
|                                            |       | Other                    | 1.29   | (1.03-1.61)          | 0.018                               | 1.40   | (1.10-1.78)          | 0.006                                                       | 1.00   | (0.92-1.10)          | 0.93  |

<sup>a</sup> A hazard ratio less than one is indicative of a lower probability of discharge by 30 days ie a longer length of stay.

<sup>b</sup> Adjusted for other variables in the table and sex, age, median household income for patient's zip code, elective admission, admitted from emergency department, transferred in, admitted at weekend, admission quarter, hospital bed size, hospital region, hospital control, hospital teaching status, presence of complex chronic condition

<sup>c</sup> LR test p-value

<sup>d</sup> Wald test-p-value

\* intra-class correlation: neonates – 0.229, non neonates 0.071

Supplemental table 5: Crude and adjusted odds ratios of death and length of stay (hazard ratios for discharge alive by 30 days)<sup>a</sup> in children (aged 0-20) with severe sepsis in 2016 by race/ethnicity and proportion of patients treated at hospital who were Black

|                  |                                                       |                | Odds of death |             |                      |                  | Hazard for discharge alive by 30 days |                      |                  |             |                      |
|------------------|-------------------------------------------------------|----------------|---------------|-------------|----------------------|------------------|---------------------------------------|----------------------|------------------|-------------|----------------------|
|                  |                                                       |                | (n=9,816)     |             | P value <sup>b</sup> | (n=9,594)        |                                       | (n=9,581)            |                  |             |                      |
|                  |                                                       | OR             | 95% CI        |             |                      | aOR <sup>c</sup> | 95% CI                                | P value <sup>d</sup> | aHR <sup>c</sup> | 95% CI      | P value <sup>d</sup> |
| Within Hospital  | Race                                                  | White          | 1             | ref         |                      | 1                |                                       |                      | 1                |             |                      |
|                  |                                                       | Black          | 1.37          | (1.19-1.58) |                      | 1.18             | (1.01-1.38)                           | 0.037                | 0.88             | (0.82-0.94) | <0.001               |
|                  |                                                       | Hispanic       | 0.97          | (0.85-1.12) |                      | 0.95             | (0.82-1.11)                           | 0.51                 | 0.94             | (0.88-1.00) | 0.065                |
|                  |                                                       | Other          | 1.17          | (0.98-1.40) | <0.0001              | 1.04             | (0.86-1.26)                           | 0.68                 | 0.97             | (0.89-1.04) | 0.39                 |
| Between Hospital | Proportion patients treated at hospital who are Black | 1 (0-1.5%)     | 1             |             |                      | 1                |                                       |                      | 1                |             |                      |
|                  |                                                       | 2 (1.6-4.7%)   | 1.16          | (0.74-1.80) |                      | 0.94             | (0.59-1.52)                           | 0.81                 | 0.99             | (0.82-1.12) | 0.92                 |
|                  |                                                       | 3 (4.8-10.8%)  | 1.50          | (1.00-2.27) |                      | 0.97             | (0.62-1.52)                           | 0.90                 | 0.88             | (0.73-1.07) | 0.19                 |
|                  |                                                       | 4 (10.9-22.9%) | 1.53          | (1.03-2.29) |                      | 1.02             | (0.65-1.58)                           | 0.95                 | 0.96             | (0.79-1.16) | 0.66                 |
|                  |                                                       | 5 (>23%)       | 1.97          | (1.31-3.00) | 0.0006               | 1.08             | (0.69-1.71)                           | 0.73                 | 0.88             | (0.72-1.08) | 0.21                 |

<sup>a</sup> A hazard ratio less than one is indicative of a lower probability of discharge by 30 days ie a longer length of stay.

<sup>b</sup> LR test p-value

<sup>c</sup> Adjusted for other variables in the table and sex, age, median household income for patient's zip code, elective admission, admitted from emergency department, transferred in, admitted at weekend, admission quarter, hospital bed size, hospital region, hospital control, hospital teaching status, presence of complex chronic condition.

<sup>d</sup> Wald test-p-value

\* intraclass correlation 0.075
